# Supplementary material for: Fabrication of porous imidazole polymerized ionic liquids with fast ion diffusing kinetics for super lithiation anode materials in lithium-ion batteries
Source: Royal Society of Chemistry journal article supplement (doi:10.1039/d2ta04223a), 2022-01-01
Supplement: d2ta04223a1.pdf [file d2ta04223a1.pdf]

## Supplementary Information for

### **Fabrication of porous imidazole polymerized ionic liquids with fast ion diffusing kinetics for super lithiation anode material in lithium-ion batteries**

Yeji Wang<sup>a</sup>, Gege Yang<sup>a</sup>, Fei Jiang<sup>b</sup>, Tianpei Qiu<sup>a</sup>, Qian Liu<sup>a</sup>, Le Zhou<sup>a</sup>, Chaofan Yang<sup>a</sup>, Junjie Huang<sup>\*a</sup>, Guoliang Dai<sup>\*c</sup>

<sup>a</sup> College of Chemistry & Chemical Engineering, Shaoxing University, Shaoxing, 312000, P. R. China, E-mail: hjj@usx.edu.cn;

<sup>b</sup> Mathematic Information College, Shaoxing University, Shaoxing, 312000, P. R. China;

<sup>c</sup> School of Chemistry Biology and Material Engineering, Suzhou University of Science and Technology, Suzhou 215009, P. R. China, E-mail: daigl@tzc.edu.cn.

## Results and Discussion

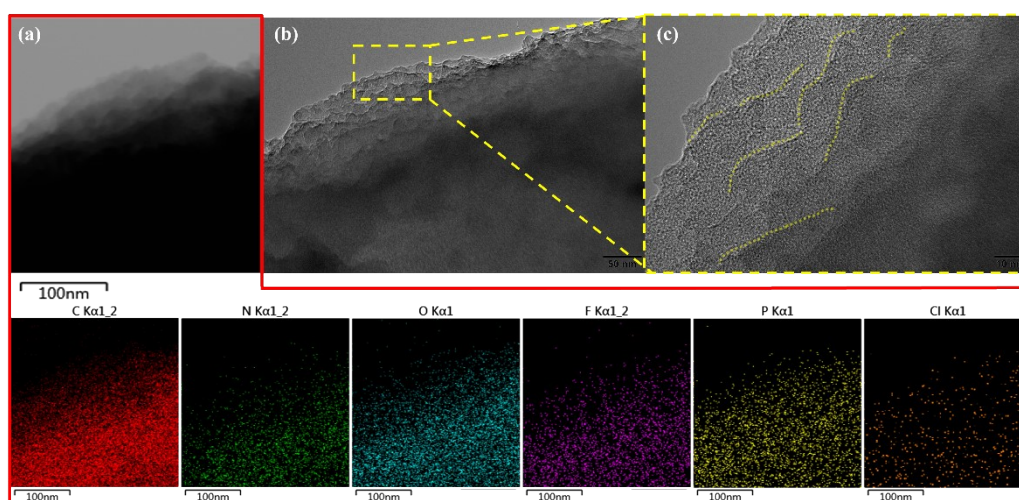

**Figure S1.** The EDS images (a) and HRTEM results (b, c) of PILs-Im electrode after long cycling test.

**Table S1.** Rate capability between PILs-Im in this work and previous organic polymer anode materials in LIBs.

| Material                                                          | Charge capacity at low current density<br>[mAh g <sup>-1</sup> ] | Charge capacity at high current density<br>[mAh g <sup>-1</sup> ] | Ref.      |
|-------------------------------------------------------------------|------------------------------------------------------------------|-------------------------------------------------------------------|-----------|
| PILs-Im                                                           | 727.7 at 100 mA g <sup>-1</sup>                                  | 165.0 at 10 A g <sup>-1</sup>                                     | This work |
| Tp-Azo-COF                                                        | 623 at 100 mA g <sup>-1</sup>                                    | 90.76 at 2.4 A g <sup>-1</sup>                                    | 1         |
| Covalent organic nanosheet                                        | ~ 720 at 100 mA g <sup>-1</sup>                                  | ~ 150 at 1.0 A g <sup>-1</sup>                                    | 2         |
| Layered functionalized covalent triazine frameworks nanosheet     | 816 at 100 mA g <sup>-1</sup>                                    | 186 at 10 A g <sup>-1</sup>                                       | 3         |
| Layered covalent triazine frameworks                              | ~ 350 at 100 mA g <sup>-1</sup>                                  | ~ 50 at 10 A g <sup>-1</sup>                                      | 3         |
| Exfoliated Schiff base network-1                                  | 542 at 100 mA g <sup>-1</sup>                                    | 212 at 5.0 A g <sup>-1</sup>                                      | 4         |
| Covalent triazine frameworks                                      | 1418.6 at 100 mA g <sup>-1</sup>                                 | 181.8 at 10 A g <sup>-1</sup>                                     | 5         |
| 2D COF polyporphyrin                                              | 666 at 200 mA g <sup>-1</sup>                                    | 195 at 4.0 A g <sup>-1</sup>                                      | 6         |
| Aromatic imide benzophenone-3,3',4,4'-tetracarboxylimide oligomer | 1074 at 42 mA g <sup>-1</sup>                                    | 58 at 2.1 A g <sup>-1</sup>                                       | 7         |
| Poly(chalcogenoviologen)s                                         | 799 at 50 mA g <sup>-1</sup>                                     | 252 at 2.0 A g <sup>-1</sup>                                      | 8         |

**Table S2.** Binding energy of N and C elements in different bonding states.

| Potential<br>(V vs Li <sup>+</sup> /Li) | Binding Energy (eV)      |           |             |             |            |             |
|-----------------------------------------|--------------------------|-----------|-------------|-------------|------------|-------------|
|                                         | Imidazole N <sup>+</sup> | Pyrrole N | Pyridinic N | imidazole C | pyridine C | methylene C |
| Pristine PILs-Im                        | 400.4                    | 399.7     | 398.5       | 286.3       | 284.9      | 284.4       |
| PILs-Im at 1.0 V                        | 400.3                    | 399.3     | 398.4       | 286.2       | 284.9      | 284.3       |
| PILs-Im at 0.1 V                        | 399.7                    | 399.2     | 398.2       | 286.0       | 284.9      | 284.2       |

## References

1. G. Zhao, Y. Zhang, Z. Gao, H. Li, S. Liu, S. Cai, X. Yang, H. Guo and X. Sun, *ACS Energy Letters*, 2020, **5**, 1022-1031.
2. S. Haldar, K. Roy, S. Nandi, D. Chakraborty, D. Puthusseri, Y. Gawli, S. Ogale and R. Vaidhyanathan, *Advanced Energy Materials*, 2018, **8**, 1800140.
3. Y. Zhu, X. Chen, Y. Cao, W. Peng, Y. Li, G. Zhang, F. Zhang and X. Fan, *Chemical Communications*, 2019, **55**, 1434-1437.
4. Z. Lei, X. Chen, W. Sun, Y. Zhang and Y. Wang, *Advanced Energy Materials*, 2019, **9**, 3.
5. F. Jiang, Y. Wang, T. Qiu, Y. Zhang, W. Zhu, C. Yang, J. Huang, Z. Fang and G. Dai, *ACS Applied Materials & Interfaces*, 2021, **13**, 48818-48827.
6. H. Yang, S. Zhang, L. Han, Z. Zhang, Z. Xue, J. Gao, Y. Li, C. Huang, Y. Yi, H. Liu and Y. Li, *ACS Applied Materials & Interfaces*, 2016, **8**, 5366-5375.
7. Y. Wang, Z. Liu, H. Liu, H. Liu, B. Li and S. Guan, *Small*, 2018, **14**, 1704094.
8. G. Li, B. Zhang, J. Wang, H. Zhao, W. Ma, L. Xu, W. Zhang, K. Zhou, Y. Du and G. He, *Angewandte Chemie. International Ed. in English*, 2019, **131**, 8556-8561.
